# Supplementary material
Source: MDPI journal article supplement (https://www.mdpi.com/2077-1312/10/3/359)
Supplement: s1 [file s1]

## Supplemental Information

**Table S1.** ANCOVA results comparing the effect of seawater pCO<sub>2</sub> and the length of exposure to treatment conditions (days) on the proportion of mussels (*M. trossulus*) that produced mineralized repaired shell (reached S3 or S4) over 10-weeks.

| Source           | df | SS     | F-value | P-value |
|------------------|----|--------|---------|---------|
| Time             | 6  | 340.07 | 48.01   | <0.001  |
| pCO <sub>2</sub> | 6  | 6.11   | 0.86    | 0.53    |
| Residuals        | 36 | 42.5   |         |         |
|                  |    |        |         |         |

**Table S2.** ANOVA results comparing the effect of seawater pCO<sub>2</sub> and mussel condition (condition index, CI) on the inorganic content (%) and force required to dislodge repaired shell material (N) within the endpoint population (10-weeks).

| Variable          | Source           | df | SS    | F-value | P-value |
|-------------------|------------------|----|-------|---------|---------|
| Inorganic Content | pCO <sub>2</sub> | 1  | 1410  | 7.211   | 0.013*  |
|                   | CI               | 1  | 10    | 0.050   | 0.825   |
|                   | Residuals        | 25 | 4888  |         |         |
| Force             | pCO <sub>2</sub> | 1  | 25.5  | 1.313   | 0.263   |
|                   | CI               | 1  | 5.7   | 0.291   | 0.594   |
|                   | Residuals        | 25 | 485.5 |         |         |
|                   |                  |    |       |         |         |

**Table S3.** ANCOVA results comparing the effect of seawater pCO<sub>2</sub> and the length of exposure (days) to treatment conditions on the force required to dislodge repaired shell (N), the inorganic content of repaired shell (%), the condition index (CI), and gonad index (GI) of mussels over course of 10-weeks within seven OA treatments.

| Variable          | Source                  | df  | SS                      | F-value | P-value |
|-------------------|-------------------------|-----|-------------------------|---------|---------|
| Force             | Time                    | 6   | 25.6                    | 5.28    | <0.001* |
|                   | pCO <sub>2</sub>        | 6   | 12.4                    | 2.57    | 0.021*  |
|                   | Time x pCO <sub>2</sub> | 36  | 45.7                    | 1.60    | 0.029*  |
|                   | Residuals               | 195 | 158                     |         |         |
| Inorganic content | Time                    | 6   | 20.8                    | 4.59    | <0.001* |
|                   | pCO <sub>2</sub>        | 6   | 17.5                    | 3.85    | 0.001*  |
|                   | Time x pCO <sub>2</sub> | 36  | 53.3                    | 1.96    | 0.002*  |
|                   | Residuals               | 195 | 147.3                   |         |         |
| Repair area       | Time                    | 6   | 0.70                    | 0.72    | 0.638   |
|                   | pCO <sub>2</sub>        | 6   | 0.78                    | 0.80    | 0.573   |
|                   | Residuals               | 36  | 37.7                    |         |         |
| CI                | Time                    | 6   | 3.66 × 10 <sup>-5</sup> | 7.55    | <0.001* |
|                   | pCO <sub>2</sub>        | 6   | 1.28 × 10 <sup>-5</sup> | 2.65    | 0.017*  |
|                   | Time x pCO <sub>2</sub> | 36  | 2.60 × 10 <sup>-5</sup> | 0.89    | 0.645   |
|                   | Residuals               | 194 | 1.57 × 10 <sup>-4</sup> |         |         |
| GI                | Time                    | 6   | 8.94 × 10 <sup>-2</sup> | 2.98    | 0.008*  |
|                   | pCO <sub>2</sub>        | 6   | 1.47 × 10 <sup>-2</sup> | 0.49    | 0.814   |
|                   | Time x pCO <sub>2</sub> | 36  | 0.047                   | 0.98    | 0.512   |
|                   | Residuals               | 194 | 0.971                   |         |         |

**Table S4.** ANCOVA results comparing the effect of seawater pCO<sub>2</sub> on the mean and max grayscale value from  $\mu$ CT scans of endpoint samples (see Figure 6B).

| Variable             | Source           | df | SS                 | F-value | P-value |
|----------------------|------------------|----|--------------------|---------|---------|
|                      |                  |    |                    |         |         |
| Mean grayscale value | pCO <sub>2</sub> | 6  | 2.77               | 0.43    | 0.85    |
|                      | Residuals        | 23 | 24.5               |         |         |
|                      |                  |    |                    |         |         |
| Max grayscale value  | pCO <sub>2</sub> | 6  | 2.77               | 2.98    | 0.56    |
|                      | Residuals        | 23 | $2.96 \times 10^2$ |         |         |
|                      |                  |    |                    |         |         |

**Table S5.** The results of two-way ANOVA and Tukey HSD comparisons of initial and final (after 10 weeks) condition (condition index, CI) and gonad indices (GI) comparing mussels in OA and field treatments.

|    | Source           | df    | SS     | F-value      | P-value |
|----|------------------|-------|--------|--------------|---------|
|    |                  |       |        |              |         |
| CI | Treatment        | 7     | 26.63  | 3.72         | 0.001*  |
|    | Time             | 1     | 41.53  | 40.60        | <0.001* |
|    | Treatment × Time | 7     | 16.7   | 2.33         | 0.030*  |
|    | Residuals        | 110   | 112.52 |              |         |
|    |                  |       |        |              |         |
| GI | Treatment        | 7     | 0.121  | 2.73         | 0.012*  |
|    | Time             | 1     | 0.006  | 0.95         | 0.331   |
|    | Treatment × Time | 7     | 0.083  | 1.88         | 0.080   |
|    | Residuals        | 107   | 0.674  |              |         |
|    |                  |       |        |              |         |
|    | Variable         | group |        | Variable     | group   |
|    |                  |       |        |              |         |
| CI | field.initial    | a     | CI     | 1600.initial | abc     |
|    | field.final      | abc   |        | 1600.final   | abc     |
|    | 400.initial      | abc   |        | 1900.initial | a       |
|    | 400.final        | bc    |        | 1900.final   | bc      |
|    | 700.initial      | ab    |        | 2200.initial | ab      |
|    | 700.final        | bc    |        | 2200.final   | c       |
|    | 1000.initial     | abc   |        | 2500.initial | abc     |
|    | 1000.final       | bc    |        | 2500.final   | abc     |
|    |                  |       |        |              |         |

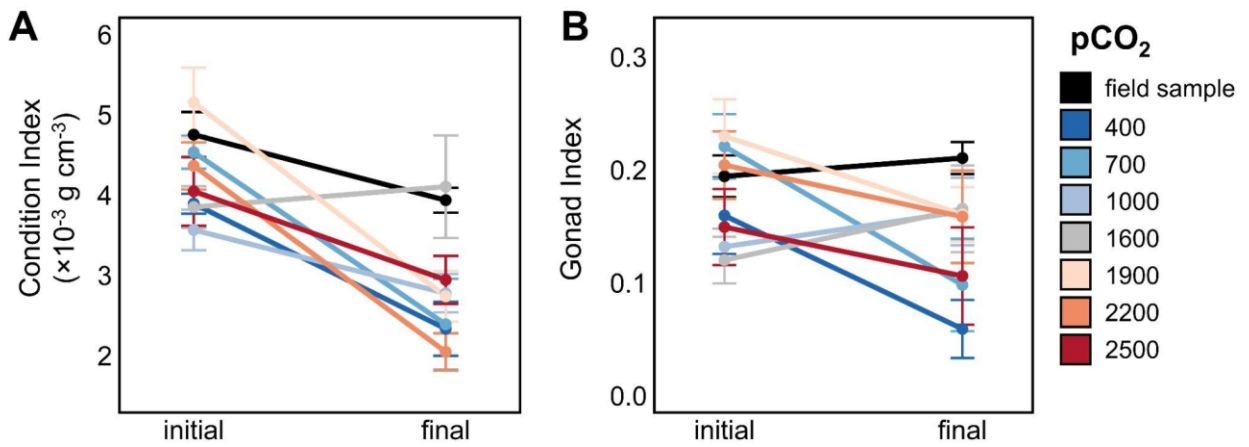

**Figure S1.** Comparison of the initial and final (after 10 weeks) condition (A) and gonad (B) indices across OA treatments and field samples.

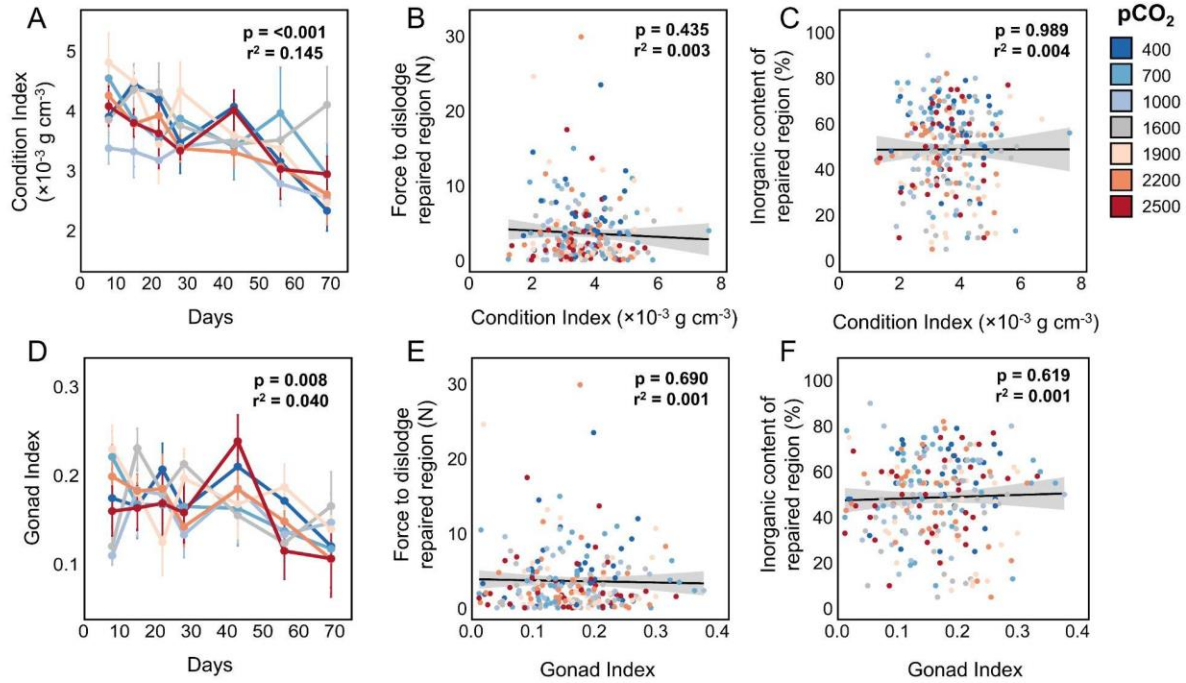

**Figure S2.** Effect of condition index (CI) and gonad index (GI) on shell repair during OA laboratory experiments. The CI of mussels universally declined under laboratory conditions regardless of OA treatment (A), with no observed effect of CI on the force required to dislodge repaired regions (B) or their inorganic content (C). Similarly, the GI of mussels also declined while housed in the laboratory (D) but did not significantly affect the force to dislodge (E) or inorganic content (F) or repaired shell region.
